# Supplementary material for: “Assessing association of societal pressure to get married with anxiety and depression among unmarried women (25-49 years) in Pakistan”: a mixed method study
Source: Research Square preprint supplement (doi:10.21203/rs.3.rs-7764693/v1), 2025-11-12
Supplement: Supplementary file 1 [file 4421207beba8603f3061e61d.docx]

# **Semi-Structured Interview Guide for IDIs**

***“Assessing association of Societal pressure to get married with Anxiety and Depression among Unmarried Women(25-49 Years) in Karachi Pakistan"***

**In-depth interviewees:** IDIs will be conducted with unmarried women (25-49 years) of age in person those agree to participate .

Note: We will not interview women who were diagnosed with any psychiatric illnesses, on antidepressant medications, having cognitive challenges. We will figure out the Personal narratives provide vital insights .

**Personal Thoughts on Marriage:**

1.1: What is the societal norm for marriage age of girls?

Probe: Can you share any specific cultural or regional variations in the expected marriage age for girls?

1.2: How is the marriage age communicated to girls?

Probe: Are there formal or informal channels through which this information is conveyed?

1.3: Who communicates?

Probe: Are there specific individuals or groups responsible for communicating the societal expectations regarding marriage age to girls?

1.4: What happens if a girl does not get married before the expected marriage age?

Probe: Are there consequences or societal perceptions associated with women who exceed the expected marriage age?

1.5: Probe: Could you give an example of the societal pressure.

Probe: How does this pressure manifest in the daily lives of women who are approaching or have passed the expected marriage age?

1.6: Who are the players of who decides the marital age of women?

Probe: Are there specific institutions, cultural authorities, or family members who play a significant role in determining the acceptable marital age for women?

1.7: What are behind this decision?

Probe: Are there cultural, religious, or socio-economic factors that influence the societal decision on the marriage age of women?

1.8: Do women get mental pressure because of this?

Probe: How does the societal expectation regarding marriage age impact the mental well-being of women?

1.9: How do women cope with this pressure?

Probe: Are there coping mechanisms or strategies that women employ to navigate the societal pressure related to marriage age?

1.10: What motivates you to remain single?

- Probe: Are there personal, cultural, or societal factors that influence an individual's decision to remain unmarried?

1.11: Have you ever considered getting married?

- Probe: How do personal experiences and societal expectations contribute to an individual's contemplation of marriage

**Reactions to Others' Marriages:**

2.1 How do you feel when someone close gets married

Probes: Share your emotions and thoughts during events like weddings.

2.2 Do societal expectations effect your reactions to others' marriages?

Probes: How do cultural norms affect your emotions when someone in your circle gets married?

**Age-related different societal pressures:**

3.1 How does society's view on marriage change as you get older?

Probe: Do you notice society expecting different things as you grow older, and how does this affect how you feel about getting married?

3.2 Do you feel more pressure from society to get married as you get older?

Probe: Has the pressure from society about marriage increased with age, and how do you handle it?

3.3 Are there specific age-related events in our community that make society emphasize getting married?

Probe: How do cultural norms about age impact what society expects from unmarried women in our community?

**4.1. Depression and Anxiety Regarding Unmarried Status:**

4.1 Does societal pressure to get married affect your mental wellbeing?

If yes why?

Probes: Does societal pressure about being unmarried contribute to your mental health?

4.2 Have you experienced judgment or stigma regarding your unmarried status that affects your mental well-being?

Probes: Share instances of negative reactions and how they effect your mental health.

4.3Have you ever sought support from friends or family when you're feeling overwhelmed?

Probe: How do your close relationships play a role in helping you manage feelings of anxiety or depression?

**5. Social Withdrawal and Isolation:**

5.1 Do you avoid social interactions or withdraw from activities you used to enjoy?

Probes: How has your social life been impacted? Do you isolate yourself due to anxiety or depression?

5.2 Have you noticed changes in your ability to concentrate or make decisions during periods of stress or sadness?

Probes: How does these changes effect your work, relationships, or daily responsibilities?

6**. Effect on Daily Life and Relationships:**

6.1 How does pressure from society to get married effect your daily life, including work, relationships, and personal well-being?

Probes: Are there specific areas where the impact is more pronounced? How does it influence your decision-making and interactions with others in these areas?
