# Supplementary material for: “Assessing association of societal pressure to get married with anxiety and depression among unmarried women (25-49 years) in Pakistan”: a mixed method study
Source: Research Square preprint supplement (doi:10.21203/rs.3.rs-7764693/v1), 2025-11-12
Supplement: Supplementary file 2 [file 60f1ed724d00420ef94e29c5.docx]

# Questionnaire

***" Assessing association of Societal pressure to get married with Anxiety and Depression among Unmarried Women(25-49 Years) in Pakistan"***

The purpose of this study is to assess the potential association of societal pressure to get married with anxiety and depression among unmarried women ( 25-49 years) in Karachi, Pakistan. Your participation involves completing a survey that will include questions related to your experiences with societal pressure to get married, anxiety, and depression.

What language would you prefer?

- English
- Urdu

**Section 1**

Consent form

The study will be conducted in Karachi, Sindh, Pakistan. The data collection method will be web based questionnaire. You will be provided with a link to an online survey platform where you can complete the questionnaire at your convenience. The survey will consist of multiple-choice and scale-based questions related to societal pressure, anxiety, and depression. It should take approximately 10 minutes to complete questionnaire, Your identity will not be disclosed anywhere. The findings will be reported in a summarized format, ensuring anonymity. Your responses will contribute to statistical analyses that may association between societal pressure and anxiety and depression.

**POSSIBLE RISKS OR DISCOMFORT**

Your participation will not pose any risk and your participation may contribute to a better understanding of the topic.

**POSSIBLE BENEFITS**

There is no immediate benefit to you for participating in this study. However a better understanding of the association of societal pressure with to get married with anxiety and depression will help in the development of strategies to help unmarried women to cope with the societal pressure.

**FINANCIAL CONSIDERATIONS**

There is no financial compensation for your participation in this research. No monetary inducements will be given to study participants for participation.

**AVAILABLE TREATMENT ALTERNATIVES**

This study is not going to experiment or test any treatment or drugs.

**CONFIDENTIALITY**

Your identity in this study will be treated as confidential. The results of the study, including views expressed by you, may be published for scientific purposes but will not give your name or include any identifiable references to you. However, any records or data obtained as a result of your participation in this study may be inspected by the sponsor or by AKU ERC members.

**TERMINATION OF RESEARCH STUDY**

You are free to choose whether or not to participate in this study. There will be no penalty or loss of benefits to which you are otherwise entitled if you choose not to participate.

- To assess the association of societal pressure to get married with anxiety and depression among unmarried women (25-49)years in Pakistan.
- To understand the perceptions and experiences of societal pressure related to marriage, and the influence of this pressure on mental health, particularly in terms of anxiety and depression among unmarried women(25-49 years) in Pakistan

Do you agree to be the part of this study?*

- Yes
- No

**Section 2**

- Screening form

Q2.b: What is your age*

- <25
- 25-49
- >49

Q2.c: Marital status*

- single
- Married
- Divorced
- Separated
- Widow

Q2.d: Have you ever been diagnosed  with any psychiatric illness other than depression and anxiety? *

- Yes
- No

**Section:3**

Socio-demographic

Q3.b: What is your level of education?*

- No formal education
- primary
- graduate
- post graduate

Q3.c: What is your current employment status?*

- unemployed
- employed

Q3.d: What is your profession?

- Healthcare/Medical
- Education/Teaching
- Administrative/Office Support
- Sales/Marketing
- Arts/Entertainment/Media
- Other-----------------

Q:3.e How would you describe your household income?*

- Less than 50,000 PKR
- 50,000 PKR - 100,000 PKR
- 100,001 PKR - 150,000 PKR
- 150,001 PKR - 200,000 PKR
- More than 200,000 PKR

Q3.f Number of siblings?

- 1
- 2
- 3
- 4
- 5 or more

Q3.g: What is the highest level of education completed by your father?

- No formal education
- Primary
- graduate
- post graduate

Q3.h: What is the highest level of education completed by your mother?

- No formal education
- Primary
- graduate
- post graduate

Q3.k ) what type of residential area you belong?

- Rural area
- Urban area

Q3.I) What is your ethnic background?

- - - Punjabi
    - Sindhi
    - Pashtun
    - Baloch
    - Muhajir
    - Other (please specify): ____________

Q3.m) What is your religious affiliation?

- - - Muslims
    - Non Muslims

**Section4:**

Evaluating Social pressure among unmarried women

**Instructions:** The following section consists of statements related to the societal and cultural pressures you may experience regarding life goals, relationships, and expectations. Please read each statement carefully and indicate the extent to which you agree or disagree with each, based on your personal experiences.

Use the scale below to mark your response:

- 1 = Strongly Disagree
- 2 = Disagree
- 3 = Neutral
- 4 = Agree
- 5 = Strongly Agree

Please choose the number that best represents your level of agreement for each statement. There are no right or wrong answers, and your honest responses will help us understand societal pressures more effectively.

1. **"I feel pressured by society to achieve certain life goals."**
   - 1 = Strongly Disagree
   - 2 = Disagree
   - 3 = Neutral
   - 4 = Agree
   - 5 = Strongly Agree
2. **"I feel like my family expects me to get married."**
   - 1 = Strongly Disagree
   - 2 = Disagree
   - 3 = Neutral
   - 4 = Agree
   - 5 = Strongly Agree
3. **"There are societal expectations I feel obligated to fulfill."**
   - 1 = Strongly Disagree
   - 2 = Disagree
   - 3 = Neutral
   - 4 = Agree
   - 5 = Strongly Agree
4. **"I am frequently reminded by others about what I should achieve by a certain age."**
   - 1 = Strongly Disagree
   - 2 = Disagree
   - 3 = Neutral
   - 4 = Agree
   - 5 = Strongly Agree
5. **"I feel judged by my community if I don’t meet certain life milestones."**
   - 1 = Strongly Disagree
   - 2 = Disagree
   - 3 = Neutral
   - 4 = Agree
   - 5 = Strongly Agree
6. **"I feel like my friends expect me to be in a committed relationship."**
   - 1 = Strongly Disagree
   - 2 = Disagree
   - 3 = Neutral
   - 4 = Agree
   - 5 = Strongly Agree
7. **"I often think about what people in my culture expect me to accomplish."**
   - 1 = Strongly Disagree
   - 2 = Disagree
   - 3 = Neutral
   - 4 = Agree
   - 5 = Strongly Agree
8. **"There is pressure from relatives to settle down and start a family."**
   - 1 = Strongly Disagree
   - 2 = Disagree
   - 3 = Neutral
   - 4 = Agree
   - 5 = Strongly Agree
9. **"I feel like my success is measured by meeting societal standards, such as marriage or career."**
   - 1 = Strongly Disagree
   - 2 = Disagree
   - 3 = Neutral
   - 4 = Agree
   - 5 = Strongly Agree
10. **"I believe my self-worth is often judged by others based on societal expectations."**
    - 1 = Strongly Disagree
    - 2 = Disagree
    - 3 = Neutral
    - 4 = Agree
    - 5 = Strongly Agree

Section 5:

Depression and Anxiety among unmarried women

Instructions: We are interested in how you feel about the following statements. Read each statement carefully. Indicate how you feel about each statement.

Circle the “0” if never

Circle the “1” if sometimes

Circle the “2” if mostly

Circle the “3” if always

circle the '9" if don't know

1.Have you been sleeping less?

2.Have you had lack of interest in daily activities?

3.Have you lost interest in your daily hobbies?

4.Have you been anxious?

5.Have you had sensation in impeding down?

6.Have you had difficulty in thinking clearly?

7.Have you preferred to be alone because of people around you?

8.Have you felt unhappy?

9.Have you felt hopeless?

10.have you felt helpless?

11.Have you been worried?

12.Have you you cried?

13.Have you thought of taking your life?

14.Have you loss of appetite?

15.have you had retrosternal burning?

16.Have you had indigestion?

17.have you had nausea?

18.have you had constipation?

19.Have you felt difficulty in breathing?

20.Have you felt tremulous?

21.Have you felt numbness in hands and feet?

22.Have you felt sensation in your neck and shoulder and back?

23.Have you had headache?

24.Have you felt in all over body?

25.Have you passed urine more frequency?Section 7 of 7

**Section 6:**

**Participation in in depth interview:**

The data collection method will consist of in-depth interviews (IDIs). IDIs will be conducted with the unmarried women of (25-49 years). IDIs will take around 25 to 30 mins.  To avoid any bias, the researcher will first explore participants’ views on the marriage. Later, the researcher will explore experiences of anxiety and depression among unmarried women aged 25-49 in Karachi, Pakistan. Interviews will be recorded for the transcription purpose. The aim of the is to explore broadly study participants’ and their mental health issues.

Q: Do you want to participate?

- Yes
- No

Q: If yes provide contact number above?

---------------------------------
